# Supplementary material for: Estimating eutrophication of world’s inland waters from gridded nitrogen and phosphorus data
Source: Research Square preprint supplement (doi:10.21203/rs.3.rs-8378137/v1), 2025-12-25

A gridded eutrophication model for the world’s inland waters from nitrogen and phosphorus data

**Olli Varis1***

1Water and Development Research Group, Aalto University, PO Box, 15200, Tietotie 1 E, 02150 Espoo, Finland

*Corresponding author

**ORCID:**

**Olli Varis** https://orcid.org/0000-0001-9231-4549

## Supplementary information

Analogous water quality indexes to our eutrophication model, this supplement documents the development of indices for organic pollution as indicated by biological oxygen demand (BOD) and salinity as indicated by total dissolved solids (TDS).

Unlike eutrophication, those water quality markers are directly used as the base of water quality classifications, whereas for TN and TP, their ecological response, eutrophication, is of concern. The equations for calculating the BOD and TDS indices are the following. They were obtained by regression analysis from the values given in Table 3.

BOD Index = 1 – *max* (0, *min* (1, (1.5626**log*(BOD) – 0.4884)/5) (R² = 0.9419) (3)

TDS Index = 1 – *max* (0, *min* (1, (y = 0.0038*TDS – 0.8419)/5) (R² = 0.9979) (4)

**Table 3.** BOD and TDS index classifications proposed. These classifications have been synthesized from key international policy documents 22,23,25.

| **Class** | **1** | **2** | **3** | **4** | **5** | **Unit** |
| --- | --- | --- | --- | --- | --- | --- |
| BOD | <3 | 3-5 | 5-7 | 7-20 | >20 | mg/l |
| TDS | <500 | 500-750 | 750-1000 | 1000-1300 | >1300 | mg/l |

The BOD index (Fig. S1a) reaches highest values in crowded and agriculturally intensive areas such as Northeasten China, South Asia, Central Europe and the Mediterranean coast, parts of the West and Central Asia, and parts of Latin America. It shows strong correspondance with the nutrient spatial patterns and particularly with TN due to common pollution sources (livestock, domestic use). In turn, the TDS index value (Fig. 3b) tops in arid areas from West and Central Asia to northern China, in Pakistan and Western India, and dry areas of the Americas and is thus more strongly related to climate (precipitation and evaporation) patterns.

**Fig. S1: Global gridded map for Biological Oxygen Demand (BOD) Index (a), and Total Dissolved Solids (TDS) Index (b).**


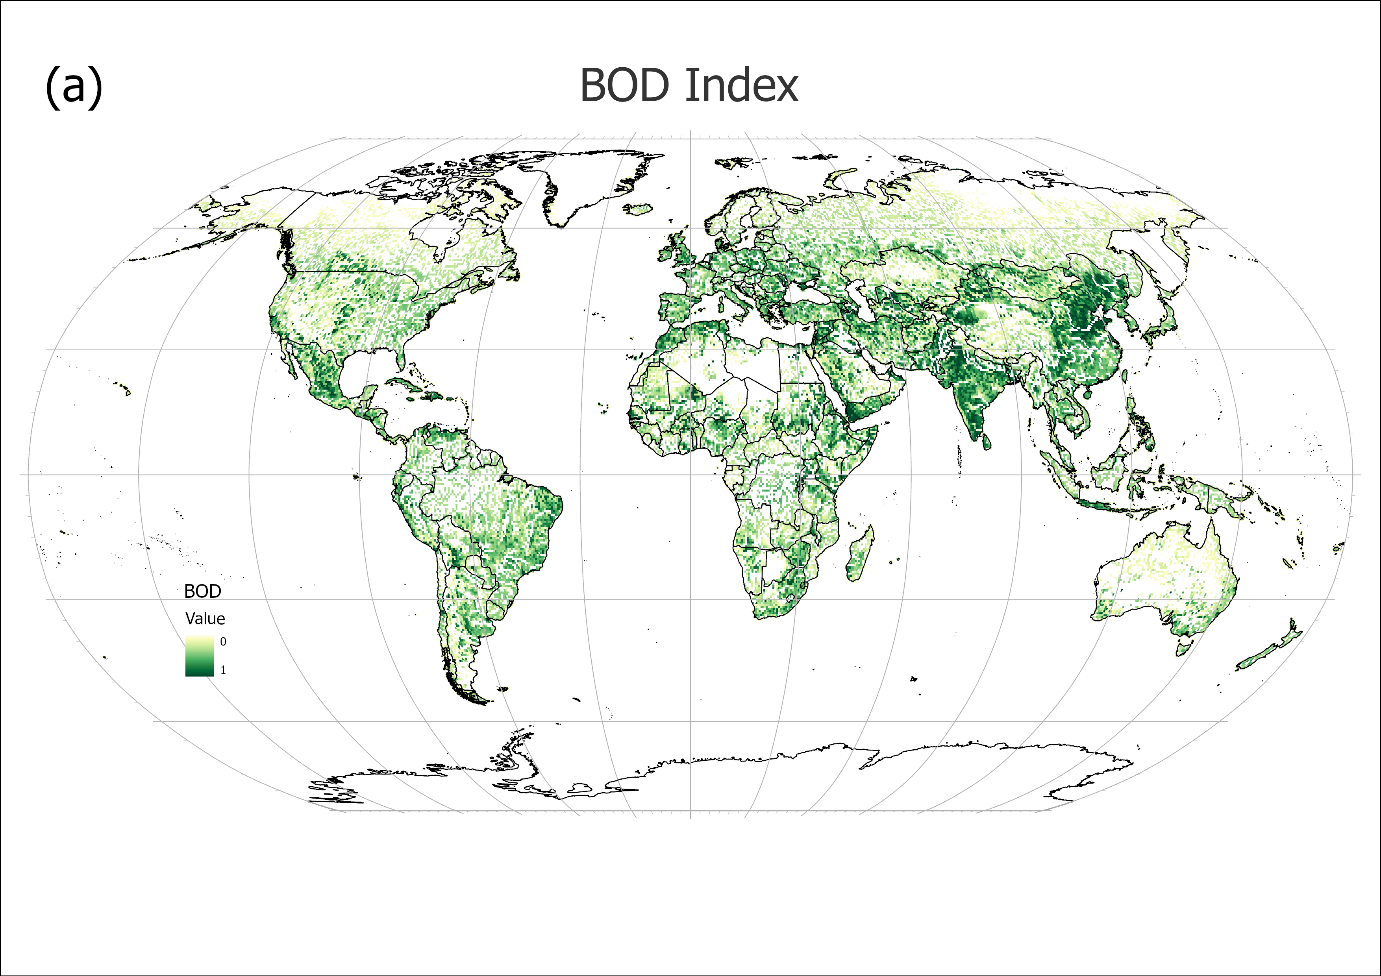

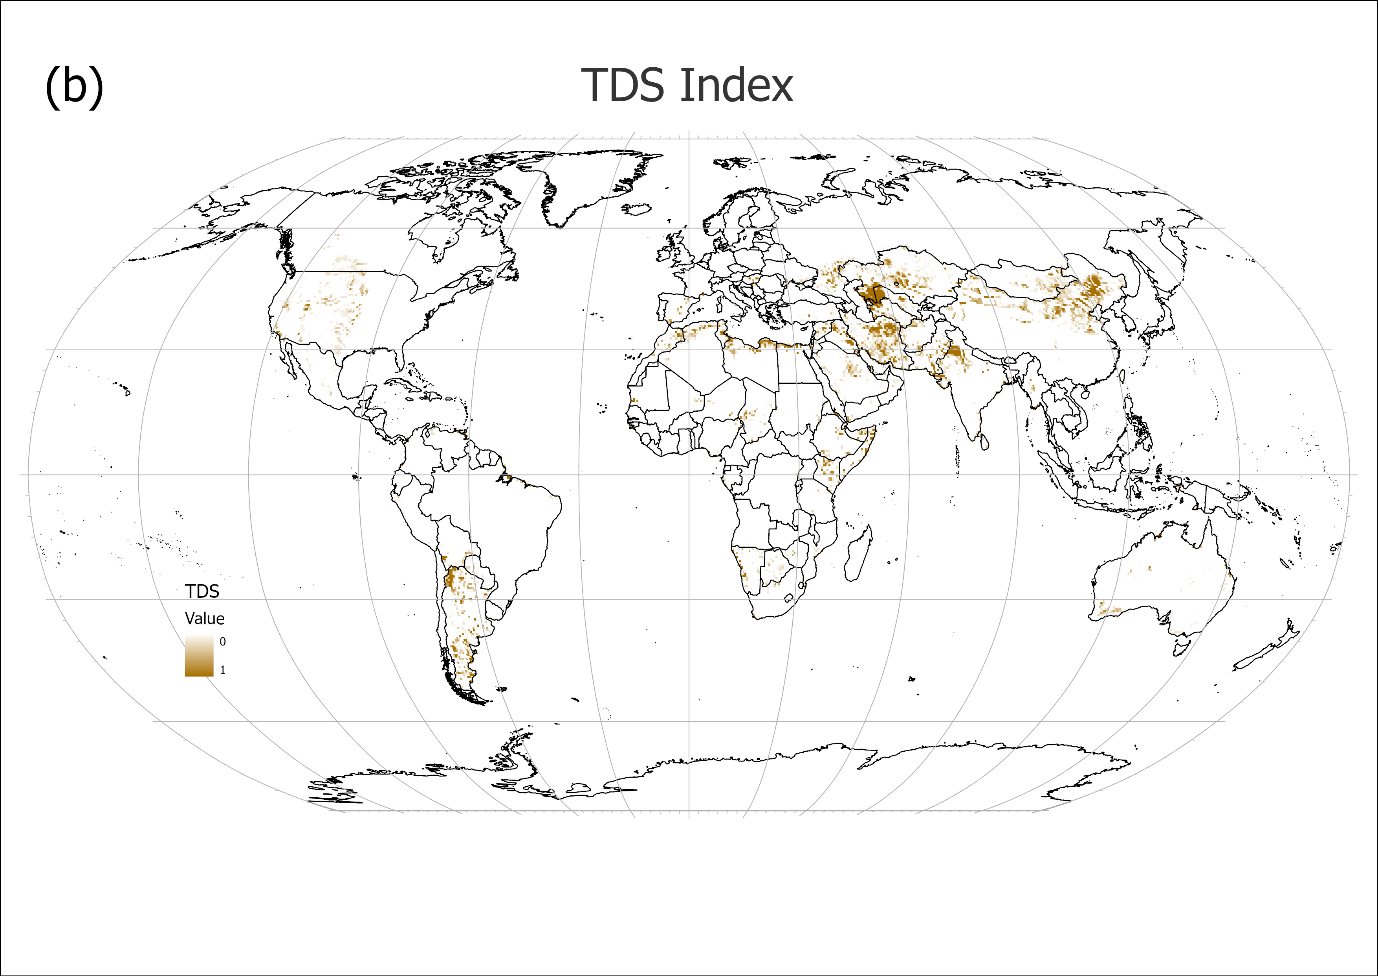

Supplement: Supplementary file 1 [file fb6e16ddfcb3a2348987cb1d.docx]
